# Supplementary material for: Socially Anxious and Confident Men Interact with a Forward Virtual Woman: An Experimental Study
Source: PubMed Central journal article supplement (PMC3324473; doi:10.1371/journal.pone.0032931), 2012-04-11
Supplement: pone.0032931.s002.pdf [file pone.0032931.s002.pdf]

# **Socially Anxious and Confident Men Interact with a Forward Virtual Woman: An Experiment Study**

Xueni Pan, Marco Gillies, Chris Barker, David Clark, Mel Slater

## **Supporting Text S1**

### **An example of a complete dialog**

Christina starts looking at the participant, and then makes her way towards him.

[C: Christina; P: Participant]

C: Hi, It looks like we are the only people alone here, right?

P: Ah yes.

C: My name is Christina. What's your name?

P: My name is xxx.

C: It's very nice to meet you.

P: Nice to meet you.

C: So, what are you doing for a living?

P: Current a student at xxx.

C: Oh, what's your subject?

P: I study xxx.

C: Very interesting, tell me more.

P: Basically we study xxx

C: enhen.

P: And I'm interested in xxx.

C: I'm an air hostess; I just arrived in London yesterday. Where do you live?

P: Sorry?

C: Where do you live?

P: Ah I live in xxx.

C: It's that a nice area?

P: I'd like to think so, but no, it's a bit rough.

C: I don't know London very well, but actually, I am thinking about moving here, what do you think?

P: Yeah definitely, London is great!

C: But I heard it rains all the time here, is that true?

P: En, no, not all the time. Once a week maybe?

C: Well, the weather is not that important to me. Have you lived here long?

P: Yeah, I've lived here all my life.

C: Do you like it here?

P: Err, it's too busy...too many people.

C: I've noticed that people dress very well around here. By the way, that shirt looks great on you. How much was it?

P: Ah, thank you. It was 15 pounds.

C: Ah, I really want to find a pair of trousers, something like those [Looking down] for my brother. Where did you get these?

P: I got them in New York in the US.

C: So, do you know anyone here?

P: Just you.

C: I feel a bit shy about talking with other people, do you mind if I talk with you for a bit longer? [start moving towards the participant to an intimate distance].

P: Don't worry about it. It's OK.

C: If you don't mind me saying, I think you look very nice.

P: Hahaha, you look very well yourself.

C: I was wondering actually, are you single, or involved with someone at this time?

P: I'm involved with someone.

C: Actually, it is the same with me.

P: OK.

C: Anyway, what are you doing after this party?

P: Probably going out with friends. How about you?

C: Alright, I see. Maybe we should meet up.

P: Yes, sure.

C: I just need to go out for a moment, shall we meet by the entrance of this building later?

P: Sounds good.

C: See you later!

P: Bye!
